# Supplementary material for: Monitoring multiple myeloma by next-generation sequencing of V(D)J rearrangements from circulating myeloma cells and cell-free myeloma DNA
Source: PubMed Central journal article supplement — Haematologica. 2017 Jun;102(6):1105–11. doi: 10.3324/haematol.2016.161414 (PMC5451343; doi:10.3324/haematol.2016.161414), 2017-06
Supplement: 2016.161414.OBERLE_SUPPL.pdf [file 2016.161414.OBERLE_SUPPL.pdf]

## Monitoring multiple myeloma by next-generation sequencing of V(D)J rearrangements from circulating myeloma cells and cell-free myeloma DNA

Anna Oberle,<sup>1</sup> Anna Brandt,<sup>1</sup> Minna Voigtlaender,<sup>1</sup> Benjamin Thiele,<sup>1</sup> Janina Radloff,<sup>1</sup> Anita Schlenker,<sup>1</sup> Malik Alawi,<sup>2</sup> Nuray Akyüz,<sup>1</sup> Manuela März,<sup>1</sup> Christopher T. Ford,<sup>1</sup> Artus Krohn-Grimberghe<sup>3,4</sup> and Mascha Binder<sup>1</sup>

<sup>1</sup>Department of Oncology and Hematology, University Medical Center Hamburg-Eppendorf, Hamburg; <sup>2</sup>Bioinformatics Core, University Medical Center Hamburg-Eppendorf, Hamburg; <sup>3</sup>LYTIQ GmbH, Paderborn and <sup>4</sup>Analytische Informationssysteme und Business Intelligence, Universität Paderborn, Germany

©2017 Ferrata Storti Foundation. This is an open-access paper. doi:10.3324/haematol.2016.161414

Received: November 30, 2016.

Accepted: February 7, 2017.

Pre-published: February 9, 2017.

Correspondence: m.binder@uke.de

---

# Suppl. Figure 1

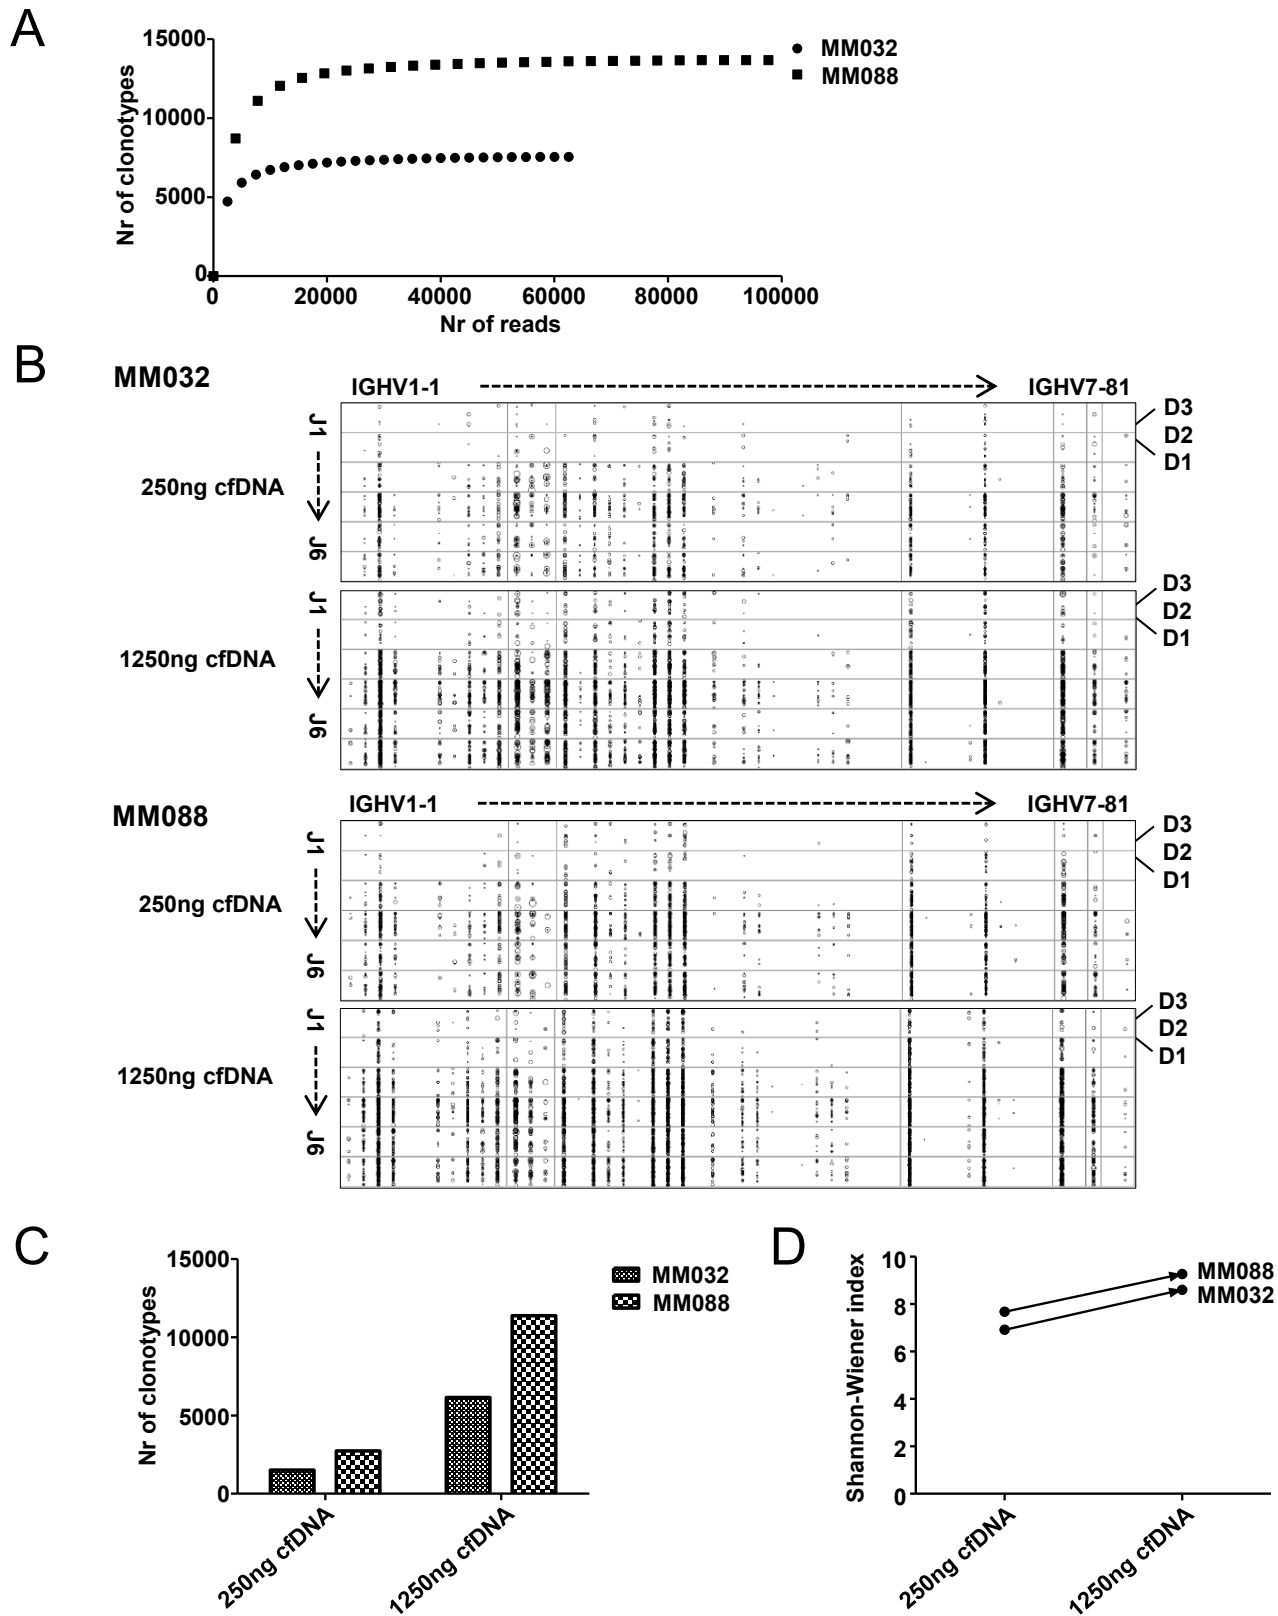

**Suppl. Figure 1: Estimation of B-lineage repertoire coverage of the V(D)J sequencing approach.**

**A:** Repertoire coverage as a function of sequencing depth. Saturation curve of clonotype repertoires of exemplary patient samples MM032 and MM088 sequenced with a theoretical sequencing depth of 80 000 reads from PCR-amplified cell-free DNA (cfDNA) with 250ng DNA input. Each data point in the curve was generated by averaging over 100 replicate subsamplings. For each subsampling a corresponding number of reads was randomly selected from the sample library. Data was plotted using GraphPad Prism 5. **B:** V(D)J repertoire plots from PCR-amplified cfDNA (250ng versus 1250ng PCR DNA input) of exemplary patients MM032 and MM088. Every dot represents a specific V(D)J rearrangement of the immunoglobulin repertoire. The size of each dot represents the proportion of the clonotype in the repertoire. The plot was generated using R statistical software tools. **C:** Number of unique clonotypes per repertoire as a function of different PCR input cfDNA amounts (250ng versus 1250ng) in exemplary patients MM032 and MM088. **D:** Shannon-Wiener diversity index of V(D)J repertoires with different input cfDNA amounts (250ng versus 1250ng) in exemplary patients MM032 and MM088. Shannon-Wiener indices were calculated as previously described (Akyüz et.al, Int. J. of Cancer 2016) and plotted with GraphPad Prism 5.

**Suppl. Table 1: Myeloma cohort blood sampling time points**

| <b>Code</b> | <b>Blood sample analyzed</b>                                                                                |
|-------------|-------------------------------------------------------------------------------------------------------------|
| MM023       | leukocytes at SD<br>plasma at SD and PR                                                                     |
| MM031       | leukocytes at PD and CR<br>plasma at baseline, PD, vgPR and CR                                              |
| MM032       | leukocytes at baseline and PD<br>plasma at baseline, vgPR and PD                                            |
| MM048       | leukocytes at baseline<br>plasma at baseline, CR and PR                                                     |
| MM050       | leukocytes at baseline and PR<br>plasma at vgPR and PR                                                      |
| MM056       | leukocytes at vgPR and PR<br>plasma at vgPR and PR                                                          |
| MM059       | leukocytes at vgPR<br>plasma at vgPR                                                                        |
| MM060       | leukocytes at CR<br>plasma at CR                                                                            |
| MM062       | leukocytes at SD<br>plasma at baseline and SD                                                               |
| MM082       | leukocytes at PR<br>plasma at PD                                                                            |
| MM085       | leukocytes at vgPR (1st line)<br>plasma at vgPR (1st line and 2nd line)                                     |
| MM087       | leukocytes at PR<br>plasma at PR                                                                            |
| MM088       | leukocytes at PR and PD<br>plasma at PR and PD                                                              |
| MM090       | leukocytes at baseline and vgPR (maintenance)<br>plasma at baseline, vgPR (1st line) and vgPR (maintenance) |
| MM095       | leukocytes at baseline and CR<br>plasma at CR                                                               |
| MM098       | leukocytes at PD (1st line), PD (r/r) and SD<br>plasma at PD (1st line), PD (r/r) and SD                    |
| MM120       | leukocytes at SD and PR<br>plasma at baseline and PR                                                        |
| MM122       | leukocytes at vgPR<br>plasma at baseline and vgPR                                                           |
| MM123       | leukocytes at baseline and vgPR<br>plasma at baseline and vgPR                                              |
| MM125       | leukocytes at vgPR<br>plasma at baseline and vgPR                                                           |
| MM155       | leukocytes at baseline<br>plasma at vgPR                                                                    |
| MM170       | plasma at PR                                                                                                |
| MM174       | plasma at SD                                                                                                |
| MM094       | Excluded from analysis                                                                                      |
| MM116       | Excluded from analysis                                                                                      |
| MM131       | Excluded from analysis                                                                                      |
| MM132       | Excluded from analysis                                                                                      |

Remission at sampling time point according to the International Myeloma Working Group uniform response criteria for multiple myeloma.

Abbreviations: CR = complete response, vgPR = very good partial response, PR = partial response, SD = stable disease, PD = progressive disease

**Suppl. Table 2: Evaluation of V(D)J sequencing sensitivity**

| <b>No of spiked DG75 cells<br/>per 75 000 leukocytes</b> | <b>DG75 VDJ clonotype detection rate<br/>(&gt; 1 read)</b> |
|----------------------------------------------------------|------------------------------------------------------------|
| 0.075                                                    | 33% (n = 3)                                                |
| 0.75                                                     | 85.7% (n = 7)                                              |
| 7.5                                                      | 100% (n = 7)                                               |
| 75                                                       | 100% (n = 7)                                               |
| 750                                                      | 100% (n = 7)                                               |
| 7 500                                                    | 100% (n = 4)                                               |
| 75 000                                                   | 100% (n = 7)                                               |

Spiking of different amounts of Burkitt lymphoma cell line DG75 into leukocytes from buffy coat. 500ng input DNA (corresponding to 75 000 leukocyte genomes) was used for the amplification of IGH and sequencing depth was set to 80 000 reads per sample. The experiments were repeated n times. Sequencing was considered positive if more than one DG75 clonotypic VDJ read was identified.
