# Supplementary material for: Monitoring multiple myeloma by next-generation sequencing of V(D)J rearrangements from circulating myeloma cells and cell-free myeloma DNA
Source: PubMed Central journal article supplement — Haematologica. 2017 Jun;102(6):1105–11. doi: 10.3324/haematol.2016.161414 (PMC5451343; doi:10.3324/haematol.2016.161414), 2017-06
Supplement: 2016_161414-Disclosures_and_Contributions.pdf [file 2016_161414-Disclosures_and_Contributions.pdf]

Haematologica  
HAEMATOL/2016/161414  
Version 3

Monitoring multiple myeloma by next-generation sequencing of V(D)J rearrangements from circulating myeloma cells and cell-free myeloma DNA

Anna Oberle, Anna Brandt, Minna Voigtlaender, Benjamin Thiele, Janina Radloff, Anita Schulenkorf, Malik Alawi, Nuray Akyüz, Manuela März, Christopher T. Ford, Artus Krohn-Grimberghe, and Mascha Binder

Disclosures: none

Contributions: MB designed study, interpreted data and wrote manuscript. AO performed experiments, interpreted data and wrote manuscript. AB and MV collected and analyzed clinical data and wrote manuscript. JR acquired patient material and clinical data. MA, NA, BT and AKG contributed to biostatistical data analysis. AS, MM and CTF performed experiments. All authors approved the final version of the manuscript and have no conflict of interest to declare.
