# Supplementary material for: Monitoring multiple myeloma by next-generation sequencing of V(D)J rearrangements from circulating myeloma cells and cell-free myeloma DNA
Source: PubMed Central journal article supplement — Haematologica. 2017 Jun;102(6):1105–11. doi: 10.3324/haematol.2016.161414 (PMC5451343; doi:10.3324/haematol.2016.161414), 2017-06
Supplement: GA_HAEMATOL-2016-161414v3-Oberle-01.pdf [file GA_HAEMATOL-2016-161414v3-Oberle-01.pdf]

# Clonotypic V(D)J rearrangement in circulating myeloma cells and DNA is a highly patient-specific detection marker for monitoring of multiple myeloma

27

Myeloma patients

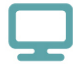

NGS to determine Clonotypic V(D)J rearrangements in BM

Clonal tracking in PB

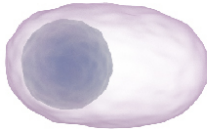

cmc-V(D)J

circulating myeloma cells

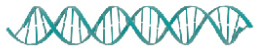

cfm-V(D)J

cell-free myeloma DNA

Timepoints

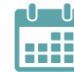

Before treatment initiation

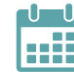

After treatment initiation

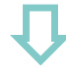

Positivity for cmc-/cfm-V(D)J was associated with conventional remission status ( $p < 0.001$ )

Persistent cmc-/cfm-V(D)J

41%

responders

91%

nonresponders/  
progressors

( $p < 0.001$ )

cmc-/cfm-V(D)J markers

are less inert than the M-protein

rely more on cell turnover

decline more rapidly after initiation of effective treatment
